# Supplementary material for: IRG1 induced by heme oxygenase-1/carbon monoxide inhibits LPS-mediated sepsis and pro-inflammatory cytokine production
Source: PubMed Central journal article supplement — Cell Mol Immunol. 2015 Feb 2;13(2):170–9. doi: 10.1038/cmi.2015.02 (PMC4786624; doi:10.1038/cmi.2015.02), 2015-02-02
Supplement: cmi201502x1.pdf [file cmi201502x1.pdf]

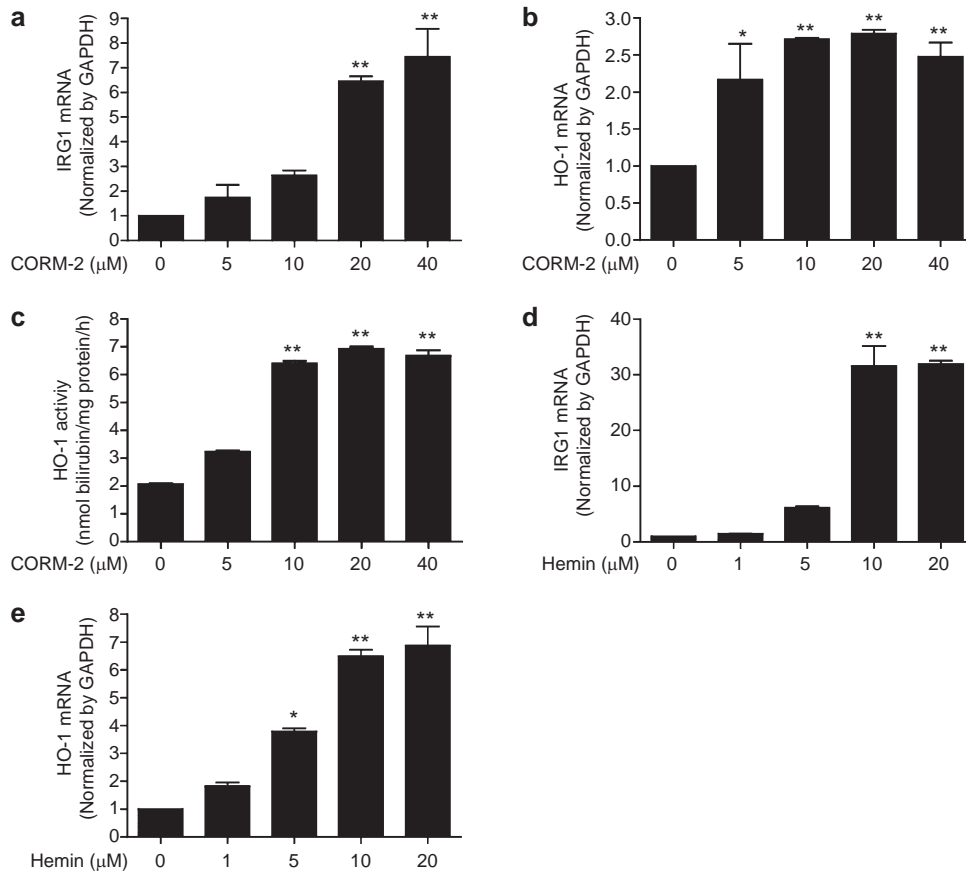

**Supplemental Figure 1** CO and HO-1 inducers increase IRG1 expression in RAW264.7 macrophages. **(a and b)** RAW264.7 cells were treated with CORM-2 in a dose-dependent manner (0, 5, 10, 20 and 40 μM) for 8 h or 16 h. **(a)** IRG1 and **(b)** HO-1 mRNA was measured at 8 h by real-time RT-PCR, and **(c)** HO-1 activity was measured at 16 h. **(d and e)** Cells were treated with hemin (0, 1, 5, 10 and 20 μM) for 8 h and IRG1 **(c)** and HO-1 **(d)** mRNA levels were measured by real-time RT-PCR analysis. Data represents mean ± s.e.m. ( $n=3$ ), \* $P<0.05$  and \*\* $P<0.001$  as compared with control.

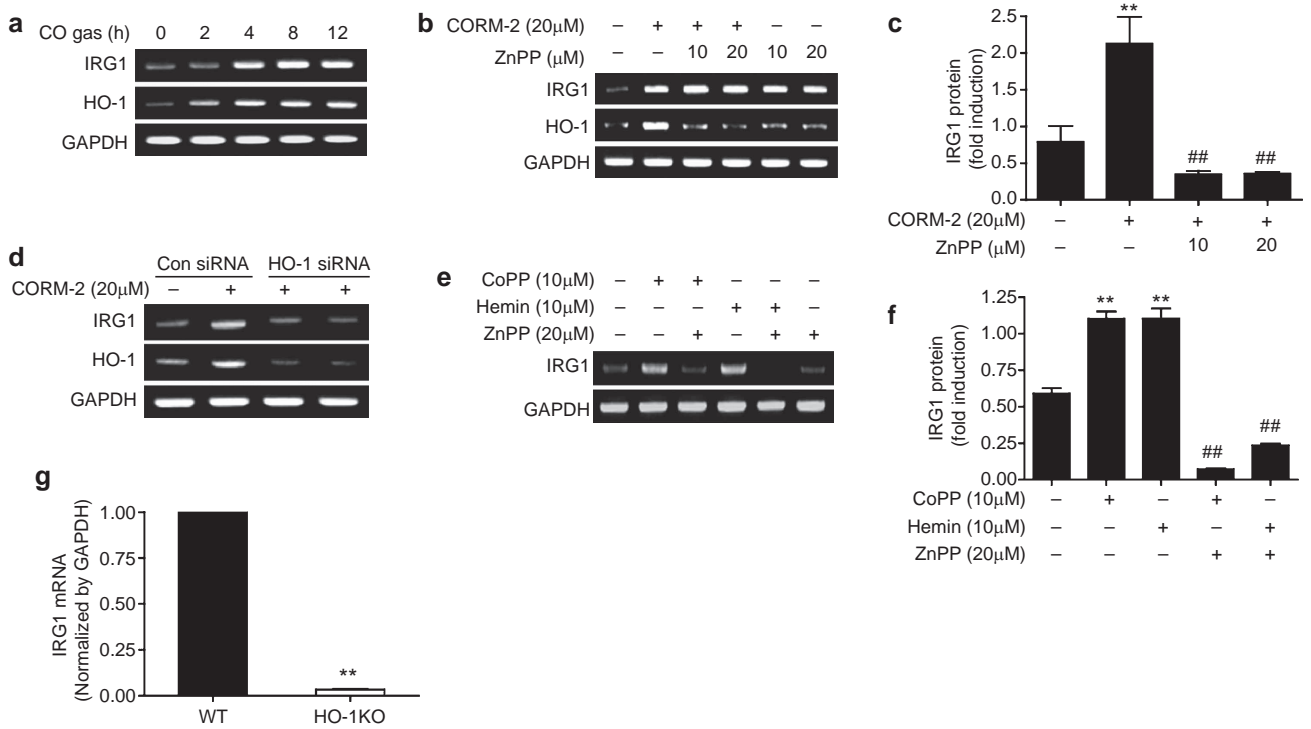

**Supplemental Figure 2** Increased level of IRG1 expression is dependent on HO-1. **(a)** RAW 264.7 cells were incubated with CO gas (250 ppm) in time-dependent manner (0, 2, 4, 8 and 12 h) and harvested cells were analyzed for IRG1 and HO-1 mRNA using RT-PCR. **(b)** Cells were pre-treated with ZnPP (0, 10 and 20  $\mu$ M) for 0.5 h and then treated with or without CORM-2 (20  $\mu$ M) for 8 h, and HO-1 and IRG1 mRNA levels were checked by RT-PCR. **(c)** Cells were pre-treated with ZnPP (0, 10 and 20  $\mu$ M) for 0.5 h and then treated with CORM-2 (20  $\mu$ M) for 16 h and, after western blotting, bands from Figure 2d were analyzed using ImageJ software. **(d)** Cells were transfected with HO-1 siRNA or control siRNA (Con siRNA). After treatment with 20  $\mu$ M CORM-2 for 8 h, cells were harvested and mRNA levels of HO-1 and IRG1 were performed by RT-PCR. **(e)** Cells were pre-treated with or without ZnPP (20  $\mu$ M) for 0.5 h and treated with 10  $\mu$ M hemin and 10  $\mu$ M CoPP for 8 h. RT-PCR analysis was performed to determine mRNA levels of IRG1. **(f)** Cells were pre-treated with or without ZnPP (20  $\mu$ M) for 0.5 h and then treated with 10  $\mu$ M hemin and 10  $\mu$ M CoPP for 16 h. Densitometric quantitation of immunoblotting presented in Fig. 2F were analyzed by using ImageJ software. **(g)** Liver tissues of Balb/c wild-type and HO-1 KO mice (female, 7–8 weeks of age, 20–25 g) were used to measure mRNA level of IRG1 by real-time RT-PCR. Data represents mean  $\pm$  s.e.m. ( $n=2$ ), \* $P<0.05$  and \*\* $P<0.001$  as compared with control/wild type (WT); and # $P<0.05$  and ### $P<0.001$  as compared with the cells exposed to only CORM-2 or hemin or CoPP.

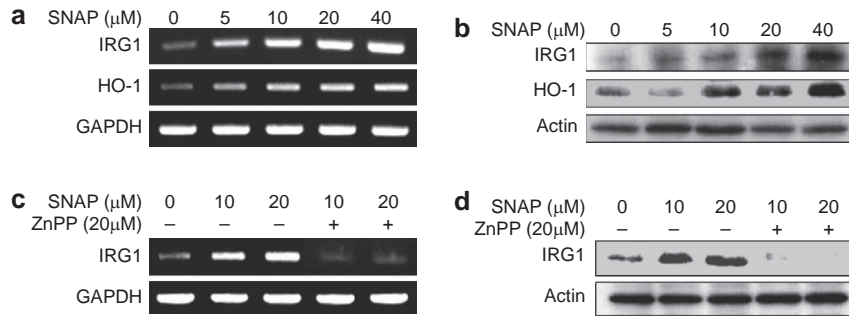

**Supplemental Figure 3** NO increases IRG1 expression in a HO-1 dependent manner in RAW 264.7 macrophages. **(a and b)** RAW 264.7 cells were treated with NO donor, SNAP at the indicated concentrations (0, 5, 10, 20 and 40  $\mu\text{M}$ ) for 8 or 16 h. **(a)** IRG1 and HO-1 mRNA were analyzed at 8 h by RT-PCR; **(b)** IRG1 and HO-1 proteins were analyzed at 16 h by western blotting. **(c and d)** Cells were pre-treated with or without ZnPP (20  $\mu\text{M}$ ) for 0.5 h and then treated with 10 and 20  $\mu\text{M}$  SNAP for 8 or 16 h. **(c)** After 8 h, IRG1 mRNA was analyzed by RT-PCR; **(d)** IRG1 protein level was analyzed after 16 h by western blotting.

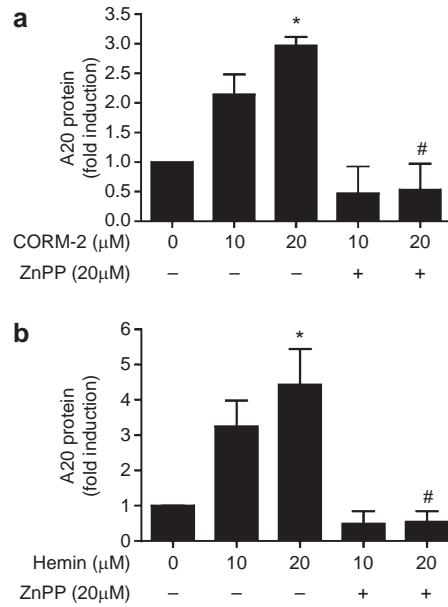

**Supplemental Figure 4** CORM-2 and hemin increase A20 in a HO-1 dependent manner in macrophages. **(a)** RAW 264.7 cells were pre-treated with ZnPP (20 μM) for 30 min and then further incubated with CORM-2 (20 μM) for 16 h. Densitometric quantitation of immunoblots for A20 expression presented in Figure 3e was performed. **(b)** Cells were pre-treated with ZnPP (20 μM) for 30 min and further incubated with hemin (10 μM) for 16 h. Densitometric quantitation of immunoblots for A20 expression as presented in Figure 3g was performed. Bands were analyzed by using ImageJ software. Data represent mean ± s.e.m. ( $n=2$ ), \* $P<0.05$  as compared with control; and # $P<0.05$  as compared with the cells exposed to CORM-2/hemin+ZnPP.

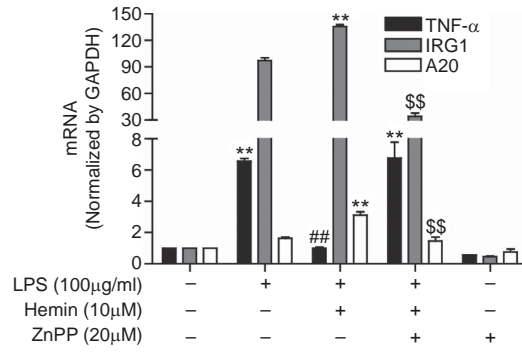

**Supplemental Figure 5** Hemin induced IRG1 decreases inflammation *via* A20 expression in RAW 264.7 macrophages. RAW 264.7 cells were pre-treated with ZnPP (20 μM) for 0.5 h and then treated with hemin (10 μM) for 1 h and then incubated with 100 ng/ml LPS for 8 h. Cell lysate was analyzed by real-time RT-PCR analysis to determine the mRNA expression of TNF-α, IRG1 and A20. Data represent mean ± s.e.m. ( $n=3$ ), \* $P<0.05$  and \*\* $P<0.001$  as compared with control; # $P<0.05$  and ## $P<0.001$  as compared with the cells exposed to only LPS and \$\$ $P<0.001$  as compared with the cells exposed to LPS+hemin.

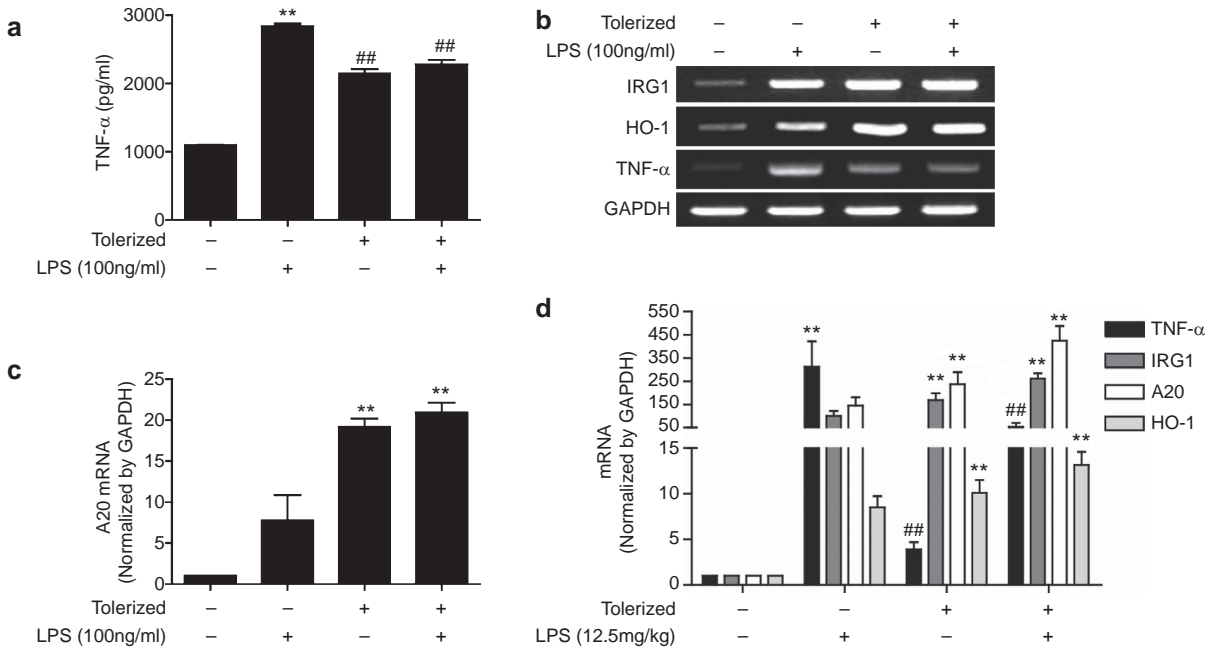

**Supplemental Figure 6** IRG1 expression is mediated in a HO-1 dependent manner in the endotoxin tolerance state. **(a and c)** RAW 264.7 cells were tolerized with LPS (100 ng/ml) for 12 h and then re-stimulated with a second round of LPS (100 ng/ml) for 8 or 12 h. **(a)** TNF- $\alpha$  production from cell supernatants was measured at 12 h by using ELISA. **(b)** RT-PCR analysis with IRG1, HO-1 and TNF- $\alpha$  mRNA were performed at 8 h. **(c)** Real-time RT-PCR was conducted to determine A20 mRNA at the 8 h time point. **(d)** Wild-type 7-week-old male C57BL/6 mice were tolerized with LPS (5 mg/ml, i.p.) for 24 h and then re-stimulated with a second round LPS (12.5 mg/ml, i.p.) for 16 h. Liver tissues were analyzed for TNF- $\alpha$ , IRG1, A20 and HO-1 mRNA by using real-time RT-PCR analysis. Data represent mean  $\pm$  s.e.m. ( $n=3$ ), \* $P<0.05$  and \*\* $P<0.001$  as compared with control; and # $P<0.05$  and ## $P<0.001$  as compared with the cells exposed to only LPS.
